# Grape seed procyanidin extract against lung cancer: the role of miR-106b, bioavailability, and bioactivity

Bingye Xue<sup>1</sup>, Qing-Yi Lu<sup>2</sup>, Larry Massie<sup>3</sup>, Clifford Qualls<sup>4</sup> and Jenny T. Mao<sup>1</sup>

<sup>1</sup>Pulmonary, Critical Care, and Sleep Section, New Mexico Veterans Administration Health Care System, University of New Mexico, Biomedical Research Institute of New Mexico, Albuquerque, NM, USA

<sup>2</sup>UCLA Center for Human Nutrition, David Geffen School of Medicine at UCLA, Los Angeles, CA, USA

<sup>3</sup>Pathology and Clinical Laboratory Services, New Mexico Veterans Administration Health Care System, University of New Mexico, Albuquerque, NM, USA

<sup>4</sup>Biomedical Research Institute of New Mexico, New Mexico Veterans Administration Health Care System, University of New Mexico, Albuquerque, NM, USA

Correspondence to: Jenny T. Mao, email: jenny.mao@va.gov

Keywords: oncomir; P21; CDKN1A; pharmacokinetics; pharmacodynamics

Received: July 23, 2017 Accepted: February 10, 2018 Epub: February 16, 2018 Published: March 20, 2018

Copyright: Xue et al. This is an open-access article distributed under the terms of the Creative Commons Attribution License 3.0 (CC BY 3.0), which permits unrestricted use, distribution, and reproduction in any medium, provided the original author and source are credited.

## ABSTRACT

**MiR-106b is an oncomir and a potential target for anti-cancer therapy. We hypothesize that grape seed procyanidin extract (GSE) exerts antineoplastic effects on lung cancer through modulations of miR-106b and its downstream target. We found that GSE significantly down-regulated miR-106b in a variety of lung neoplastic cells and increased cyclin-dependent kinase inhibitor 1A (CDKN1A) mRNA and protein (p21) levels. Transfection of miR-106b mimics reversed the up-regulations of CDKN1A mRNA and p21, abrogated the GSE induced anti-proliferative and anti-invasive properties in lung cancer cells. Oral gavage of leucoselect phytosome (LP), a standardized GSE to athymic nude mice down-regulated MIR106B mRNA and miR-106b expressions, and increased CDKN1A mRNA expression in tumor xenografts, correlating to significant reduction of tumor growth. To assess bioavailability, GSE and metabolites in plasma levels, between 60–90 minutes after gavage of LP were measured by LC/MS at treatment week 4 and 8. A novel bioactivity assay was also developed using lung homogenates from treated mice co-cultured with human lung cancer cells. LP-treated mouse lung homogenates significantly reduced proliferations of various lung cancer cells. Our findings reveal novel antineoplastic mechanisms by GSE, further define the pharmacokinetics and pharmacodynamics of LP, and support the continued investigation of LP against lung cancer.**

## INTRODUCTION

Derived from seeds of grapes (*Vitis vinifera*), GSE is high in procyanidins with strong antioxidant capabilities [1, 2]. GSE is mainly used as a health food supplement to improve cardiovascular health [3]. Preclinical studies have shown antineoplastic effects of GSE against a variety of cancers, including lung cancer [4–9]. We recently reported that modulations of oncogenic microRNA (miRNA) or oncomir miR-19a/b, contributed to the antineoplastic properties of GSE against non-small cell lung cancer

(NSCLC) and bronchial premalignant cells [8]. MiRNAs are small noncoding RNA molecules with regulatory function and tissue specificity that can modulate multiple molecular targets across several mechanistic pathways. Through mRNA degradation and/or translational repression, miRNAs function as epigenetic modifiers and mediate post-transcriptional regulation of specific mRNAs [10]. Various miRNAs have been identified as oncomirs, based on their associations with cancer [11]. Oncomirs can mediate pro- or anti-tumor effects, are stable against degradation, and can be easily quantified in tissue samples

and body fluids with simple assays like real time (q) PCR. Ample studies have shown that specific miRNA signatures in biospecimens had remarkable sensitivity and specificity in discriminating cancer patients from healthy subjects [12, 13]. These characteristics support the potential of oncomirs as therapeutic targets and surrogate endpoint biomarkers (SEBM) for lung cancer treatment and chemoprevention studies.

In this study, we found that GSE significantly down-regulated the expression of oncomir miR-106b in a variety of human lung cancer cell lines, including A549 (adenocarcinoma), H1299 (metastatic NSCLC), DMS114 (Small cell lung cancer, SCLC), and H23 (adenocarcinoma). Reduction of miR-106b correlated with decreased human lung cancer cell proliferations, as well as up-regulations of *CDKN1A* mRNA expressions, and the respective protein product p21, a predicted target of miR-106b (TargetScanHuman, [http://www.targetscan.org/vert\\_61](http://www.targetscan.org/vert_61)). Transfection with miR-106b mimic significantly reversed the anti-proliferative effects of GSE in lung cancer cells, and abrogated the GSE-induced up-regulation of *CDKN1A* and p21. In addition, transfection with miR-106b mimic significantly reversed the anti-invasive effects of GSE in A549 cells.

To facilitate future translation into clinical trials, we selected an inexpensive GSE preparation, leucoselect phytosome (LP), standardized to smaller size grape seed oligomeric procyanidins (OPC) and complexed with soy phospholipids into phytosomes to improve bioavailability, for our *in vivo* preclinical efficacy study [8]. Oral gavage of LP to athymic nude mice bearing A549 NSCLC xenografts significantly down-regulated the expressions of miR-106b and its precursor *MIR106B* mRNA, and increased *CDKN1A* mRNA expression in tumor xenografts, correlating to markedly reduced tumor growth.

To further define the bioavailability of LP, levels of GSE (procyanidins B1 and B2) and metabolites in plasma samples obtained 60–90 minutes after oral gavage were measured. The concentration of GSE that was associated with 50% *in vitro* tumor cell growth inhibition or cytotoxicity ( $IC_{50}$ ) based on MTT assay (45  $\mu\text{g/ml}$ ) [8], was much higher than the *in vivo*  $IC_{50}$  of the sum of plasma GSE and metabolites levels (0.875  $\mu\text{g/ml}$ ), obtained from the athymic nude mouse tumor xenograft model.

We also designed a novel fresh frozen lung homogenate co-culture with lung neoplastic cells as a surrogate model system to assess the bioactivity of orally administered LP in the lungs. Lung homogenates from LP-treated mice dose-dependently inhibited proliferations of a variety of lung cancer cell types. Our findings reveal novel anti-neoplastic mechanisms by GSE, demonstrate systemic bioavailability of LP and bioactivity of LP in the lungs, and support the further investigation of LP as an anti-neoplastic and chemopreventive agent for lung cancer.

## RESULTS

### GSE significantly down-regulated expressions of oncomir miR-106b, and mRNA of its precursor *MIR106B* gene in lung neoplastic cells

Specific qPCR demonstrated the dose-dependent, down-regulation of miR-106b (Figure 1A), its precursor *MIR106B* gene (Figure 1B) and further confirmation was obtained with miR-106b specific ISH assay in A549 cells (Figure 1C). GSE also down-regulated both miR-106b and *MIR106B* precursor in H1299 (Figure 1D), DMS114 (Figure 1E), and H23 cells (Figure 1F). GSE, however, did not down-regulate miR-106b in H520 cells (data not shown).

### GSE induced anti-proliferative effects in lung neoplastic cells via down-regulation of miR-106b, which was abrogated by transfection of miR-106b mimic

To ascertain the role of miR-106b in mediating the anti-neoplastic property of GSE, we evaluated the ability of miR-106b mimic transfection in reversing the anti-proliferative effects of GSE in A549 and H1299 cells. MiR-106b mimics significantly abrogated the GSE mediated anti-proliferative effects in these lung cancer cells (Figure 2A and 2B).

### GSE increased *CDKN1A/P21* in lung cancer cells via down-regulation of miR-106b

We then evaluated the effects of GSE treatment on predicted targets of miR-106b that are known to play a role in cell proliferation, including *CDKN1A* or p21. P21 is a potent cyclin-dependent kinase inhibitor that functions as an inhibitor of cell cycle progression. GSE significantly and dose-dependently increased both *CDKN1A* mRNA expressions and p21 production in A549 cells (Figure 3A). Transfection of miR-106b mimics partially abrogated the GSE-mediated up-regulation of *CDKN1A* mRNA expression (Figure 3B) and p21 production (Figure 3C). Additionally, GSE significantly increased *CDKN1A* mRNA expression in H1299 (Figure 3D), DMS114 (Figure 3E) and H23 (Figure 3F) cells. However, GSE did not increase *CDKN1A* mRNA expression in H520 cells (data not shown).

### GSE induced anti-invasive effects in lung neoplastic cells via down-regulation of miR-106b, which was abrogated by transfection of miR-106b mimic

To ascertain the role of miR-106b in mediating the anti-invasive property of GSE, we evaluated the ability of miR-106b mimic transfection in reversing the reduction of A549 cell invasion by GSE. MiR-106b mimics

significantly abrogated the GSE-mediated anti-invasive effects in A549 cells (Figure 4A and 4B).

### LP treatment significantly down-regulated *MIR106B* mRNA, miR-106b, and up-regulated *CDKN1A* mRNA expressions in human lung tumor xenografts

To confirm that the *in vitro* effects of GSE do occur *in vivo*, we assessed and compared the expressions of precursor *MIR106B* mRNA, miR-106b, and *CDKN1A* mRNA in lung tumor xenografts with or without LP treatment. Oral LP treatment significantly down-regulated expressions of miR-106b, *MIR106B* mRNA, and up-regulated mRNA expression of *CDKN1A* (Figure 5).

### Plasma GSE and metabolites as markers of bioavailability for LP treatment

To determine the systemic bioavailability of oral LP, levels of GSE and metabolites including procyanidins B1 and B2, catechin, epicatechin, procyanidin gallate, epicatechin gallate, methyl catechin, methyl-epicatechin

and methyl-epicatechin gallate, were measured in mouse plasma obtained between 60–90 minutes after gavage of LP at week 4 and 8 of treatment. The plasma concentrations of procyanidins (Figure 6A) and sum of GSE + metabolites (Figure 6B) appeared to be sustained or increased over time with continued dosing.

### Lung homogenates from LP treated nude mice significantly reduced proliferations of various lung cancer cell types

To demonstrate the feasibility of a co-culture system as a surrogate bioassay to assess the bioavailability and bioactivity of an orally administered natural agent in the lungs, we developed a method using fresh, snap frozen whole lung homogenates (standardized by wt./volume) from nude mice treated with LP in our efficacy study. We placed lung homogenate on culture insert for 12-well plates, then combined the inserts in 12-well culture plates pre-plated with A549, H1299 or H23 cells grown overnight on the bottom wells. The co-cultures were then incubated overnight (Figure 7A). Co-culture with lung homogenates from LP treated mice significantly and dose-

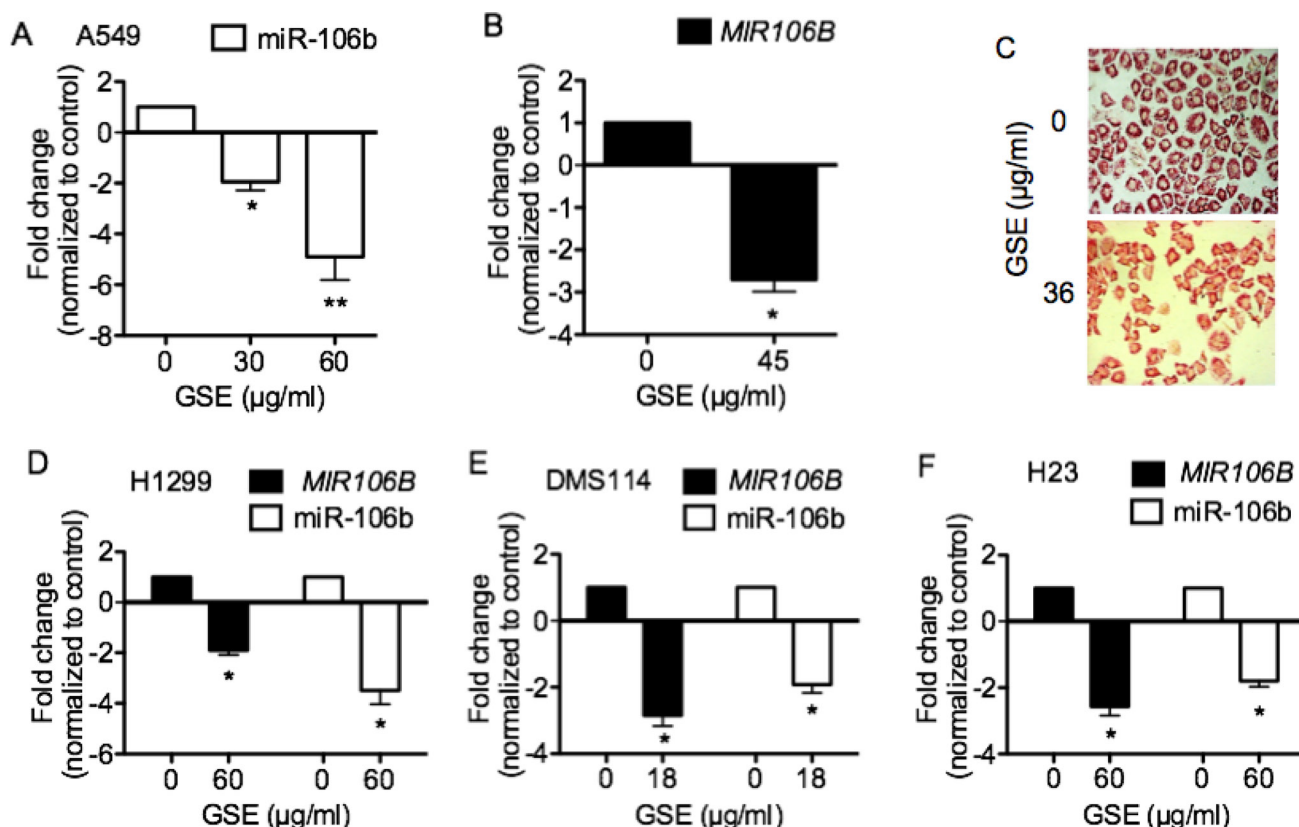

**Figure 1: GSE significantly down-regulated oncomir miR-106b expression, and its precursor *MIR106B* mRNA expression in lung neoplastic cells.** Specific qPCR demonstrated down-regulation of (A) miR-106b, (B) *MIR106B* mRNA in A549 cells ( $n = 3$ ). MiR-106b ISH assays further confirmed the down-regulation of these miRNA in A549 cells by GSE. (C) Representative photomicrograph of miR-106b specific ISH assay with fast red stain in conditioned A549 cells. Magnification: 400 $\times$ . (D) GSE also significantly down-regulated the expression of miR-106b and *MIR106B* mRNA in (D) H1299 cells, (E) DMS114 cells and (F) H23 cells ( $n = 3$ ). Columns, mean; bars, SD. \* $P < 0.05$ ; \*\* $P < 0.01$ .

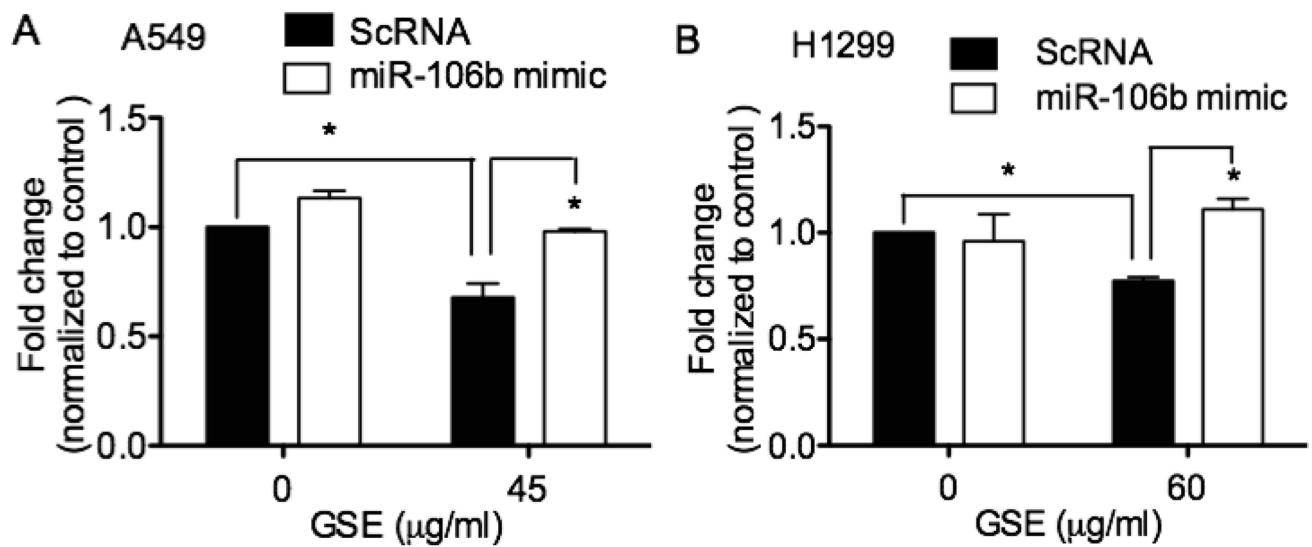

**Figure 2: GSE induced anti-proliferative effects in lung neoplastic cells via down-regulation of miR-106b.** Quantification of cell proliferation in conditioned A549 and H1299 cells was assessed by MTT assay. Overnight GSE treatment significantly reduced (A) A549 and (B) H1299 cell proliferation, but not in NHBE cells, data not shown [9]. The GSE-induced anti-proliferative effects in lung neoplastic cells was abrogated by transfection of miR-106b mimics. Control represented cells treated with scrambled oligonucleotides, ScRNA. Columns, mean; bars, SD. \* $P < 0.05$ .

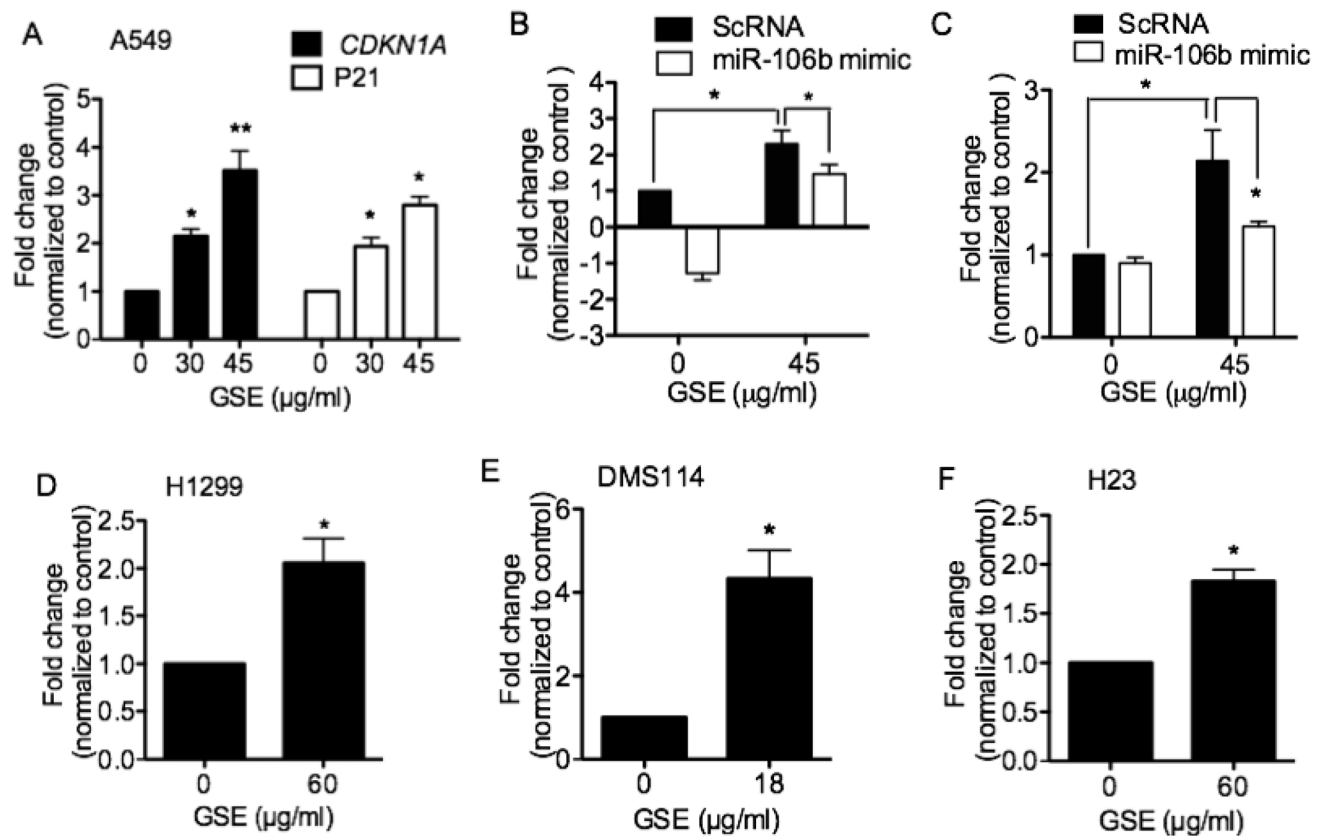

**Figure 3: GSE significantly increased (A) mRNA expressions of *CDKN1A* and p21 protein production, and miR-106 mimic abrogated such increases in (B) *CDKN1A* mRNA expression and (C) p21 protein production in A549 cells. GSE also significantly increased *CDKN1A* mRNA expression in (D) H1299, (E) DMS114, and (F) H23 cells. Columns, mean; bars, SD ( $n = 3$ ). \* $P < 0.05$ , \*\* $P < 0.01$ .**

dependently reduced lung neoplastic cell proliferations (Figure 7B and 7C).

## DISCUSSION

In this study, we report for the first time, the roles of miR-106b, and its downstream target CDKN1A or p21, in mediating the anti-neoplastic properties of GSE against NSCLC and SCLC. We also demonstrate the utility of a novel fresh frozen whole lung homogenate co-culture system for assessing bioavailability and antitumor bioactivity of orally administered LP to the target organ of interest. We further report the plasma levels of GSE and the sum of GSE and metabolites levels in nude mice from

our modified PK study with oral administration of LP, the concentrations of which are substantially lower than the  $IC_{50}$  required to achieve similar degree of tumor growth inhibition *in vitro*.

Aberrant expression of miRNA has been implicated as a driver of tumorigenesis/promotion, including classical cancer pathways such as increases in cell proliferation, angiogenesis and resistance to apoptosis. MiR-106b is one of these oncomirs that has been reported to play a role in tumors of many organs including lung [14–20]. Down-regulation of miRNA-106b by GSE has been shown to inhibit growth of melanoma cells by promoting G1-phase cell cycle arrest and reactivation of p21 protein [21]. In our study, we also show that GSE down-regulates

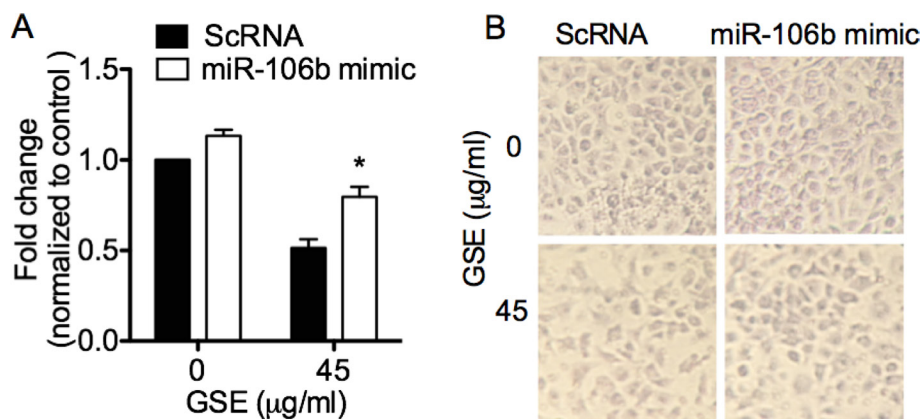

**Figure 4: GSE induced anti-invasive effects in lung neoplastic cells via down-regulation of miR-106b, which was abrogated by transfection of miR-106b mimic.** GSE treatment significantly reduced the invasion of A549 cells through the 8 µM pore size co-culture inserts coated with matrigel as extracellular matrix (ECM), and transfection of miR-106b mimic significantly abrogated the GSE-mediated anti-invasive effects in A549 cells (A). (B) Representative photomicrographs of conditioned A549 cells on the bottom side of the inserts that have invaded through the matrigel. Control represented cells treated with scrambled oligonucleotides, ScRNA. Columns, mean; bars, SD. \* $P < 0.05$ .

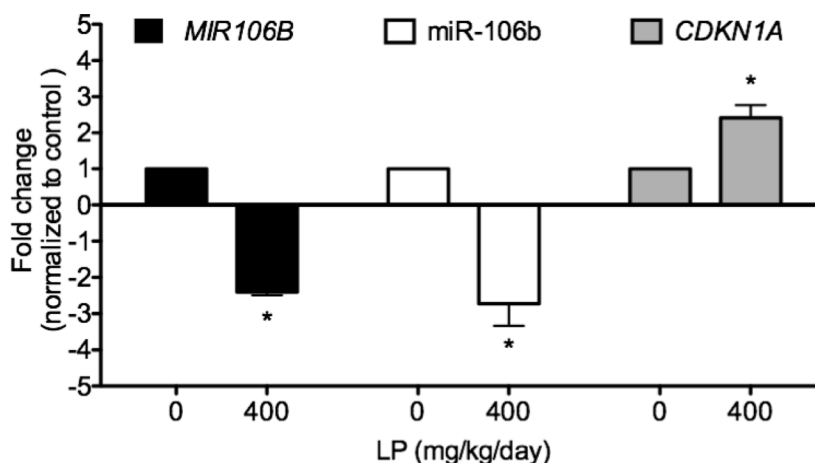

**Figure 5: LP treatment significantly down-regulated *MIR106B* mRNA, miR-106b, and upregulated *CDKN1A* mRNA expressions in human lung tumor xenografts.** To confirm that the *in vitro* effects of GSE do occur *in vivo*, we assessed and compared the expressions of *MIR106B*, miR-106b, and *CDKN1A* in lung tumor xenografts with or without LP treatment using qPCR. Eight weeks of oral LP treatment (water vs. LP of 400 mg/kg/day containing 112 mg/kg/day of GSE) via gavage, significantly down-regulated expressions of miR-106 and mRNA of its precursor gene *MIR106B*, and up-regulated mRNA expression of *CDKN1A*. Columns, mean; bars, SD ( $n = 5$ ). \* $P < 0.05$ .

miR-106b, which in turn up-regulates *CDKN1A* gene mRNA expression and its respective protein p21 production in our lung cancer models. Furthermore, we demonstrate that GSE down-regulates the mRNA expression of *MIR106B* precursor gene. We previously reported that GSE down-regulated the miR-17-92 cluster host gene (*MIR17HG*) and miR-19a/b in various NSCLC (A549, H520, H1299) and bronchial premalignant cancer cells, leading to up-regulations of their downstream targets - tumor suppressors PTEN and IGF2R [8]. As the *MIR106B* gene is a paralogue of mir-17-92 cluster, it is conceivable that GSE down-regulates miR-106b via similar molecular mechanisms at the level of miRNA precursor gene transcription in lung tumors. The ability of GSE in modulating miR-106b and its downstream targets provides further evidence on its multi-faceted antineoplastic properties against lung cancer. However, it is noteworthy that GSE did not significantly decrease *MIR106B* nor miR-106b expression in H520, a squamous cell carcinoma cell line, in contrast to what was observed with miR-19a/b. Yet from a phenotypic standpoint (anti-proliferative and induction of apoptosis), GSE was very effective against H520. This finding suggests that the differential effects of GSE on oncomirs expressions are likely cell type specific, may potentially involve differential regulation of specific RNA processing enzymes in different lung cancer cell types that contribute to the heterogeneity of lung cancer biology. The precise mechanisms accounting for such variations among different cell types may have important clinical implications toward the development of precision medicine

and identification of novel molecular targets for lung cancer. Further investigation is warranted but is beyond the scope of the present study and remains to be elucidated.

CDKN1A or p21 is a potent cyclin-dependent kinase inhibitor capable of inhibiting all cyclin/CDK complexes, although it is primarily associated with inhibition of CDK2. P21 promotes cell cycle arrest in response to many stimuli and is well positioned to function as both a sensor and an effector of multiple anti-proliferative signals [22]. The P21 protein is encoded by the *CDKN1A* gene located on chromosome 6 (6p21.2) in humans [23]. P21 represents a major target of p53 activity and is associated with linking DNA damage to cell cycle arrest. This protein can interact with proliferating cell nuclear antigen, a DNA polymerase accessory factor, and plays a regulatory role in S phase DNA replication and DNA damage repair. This is consistent with our findings that transfection of miR-106b mimics abrogated the antiproliferative effect of GSE in lung neoplastic cells. In addition, p21 has been shown to be specifically cleaved by caspase 3-like caspases, which leads to a dramatic activation of CDK2, and may be instrumental in the execution of apoptosis following caspase activation. We previously reported that GSE induced apoptosis in NSCLC cells via the activation of caspase 3 [9]. Conceivably, the activation of caspase 3 is mediated, in part, through an increase in p21 production from the down-regulation of miR-106b.

In addition to mediating the anti-proliferative effects of GSE, we found that miR-106b was involved in the anti-invasive effects of GSE in lung cancer, another important

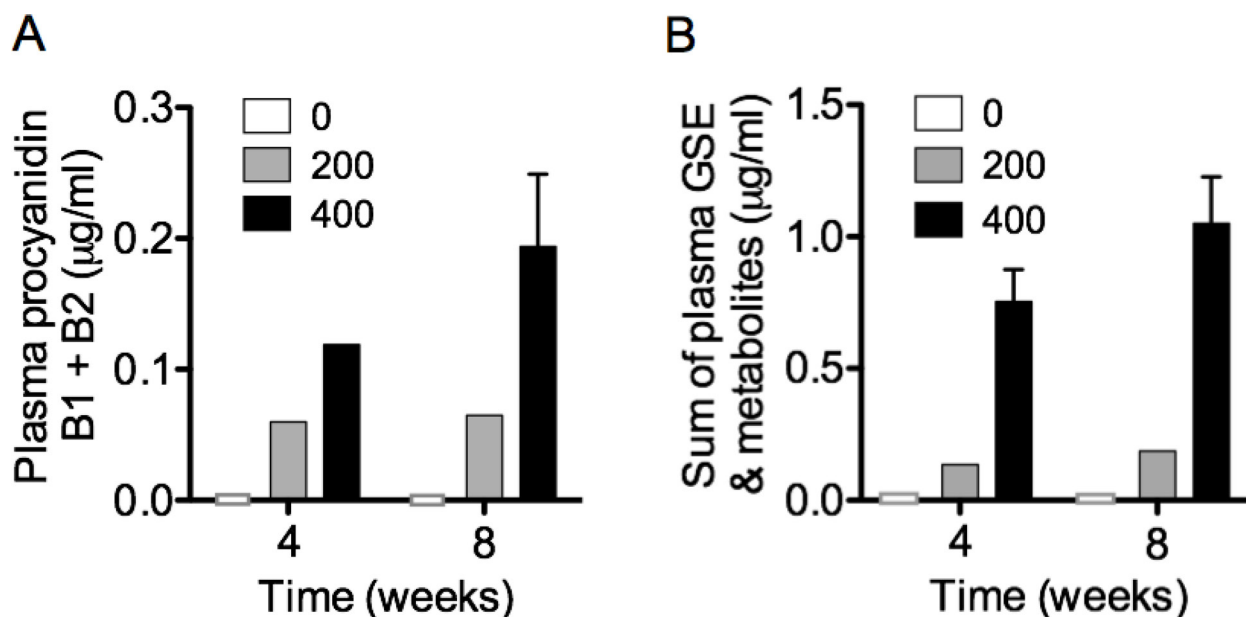

**Figure 6: Plasma GSE and metabolites were measured as markers of bioavailability for LP treatment.** The systemic bioavailability of oral LP, including procyanidins B1 and B2, catechin, epicatechin, procyanidin gallate, epicatechin gallate, methyl catechin, methyl-epicatechin and methyl-epicatechin gallate, were measured in mouse plasma obtained between 60–90 minutes after gavage of LP at week 4 and 8 of treatment. The plasma concentrations of (A) procyanidins B1 + B2 and (B) sum of GSE + metabolites appeared to be sustained or increased over time with continued dosing.

hallmark of the malignant phenotype. In a recent report, the p53/p21 complex rather than p53 itself regulates cell invasion and death by targeting Bcl-2 proteins [24], suggesting that the GSE-induced down-regulation of miR-106b likely reduce lung cancer cell invasiveness, in part, though the increase in P21 production.

Because the absorption of GSE is affected by molecular wt. and the variable compositions of GSE polyphenols in different products on the market also contribute to low and erratic bioavailability [25–26], we selected LP, a GSE preparation standardized to

smaller size oligomeric procyanidins (OPC) and complexed with soy phospholipids into phytosomes (1:2.6 w/w) to improve bioavailability, as the agent of choice in our preclinical study. A modified PK study was conducted to ascertain the bioavailability of GSE and metabolites following oral administration of LP in nude mice. Procyanidins are metabolized to catechin, epicatechin, epicatechin gallate, methyl catechin, methyl-epicatechin and methyl-epicatechin gallate. Even with the assumption that all these polyphenols are biologically active, the sum of these polyphenols in the plasma is still

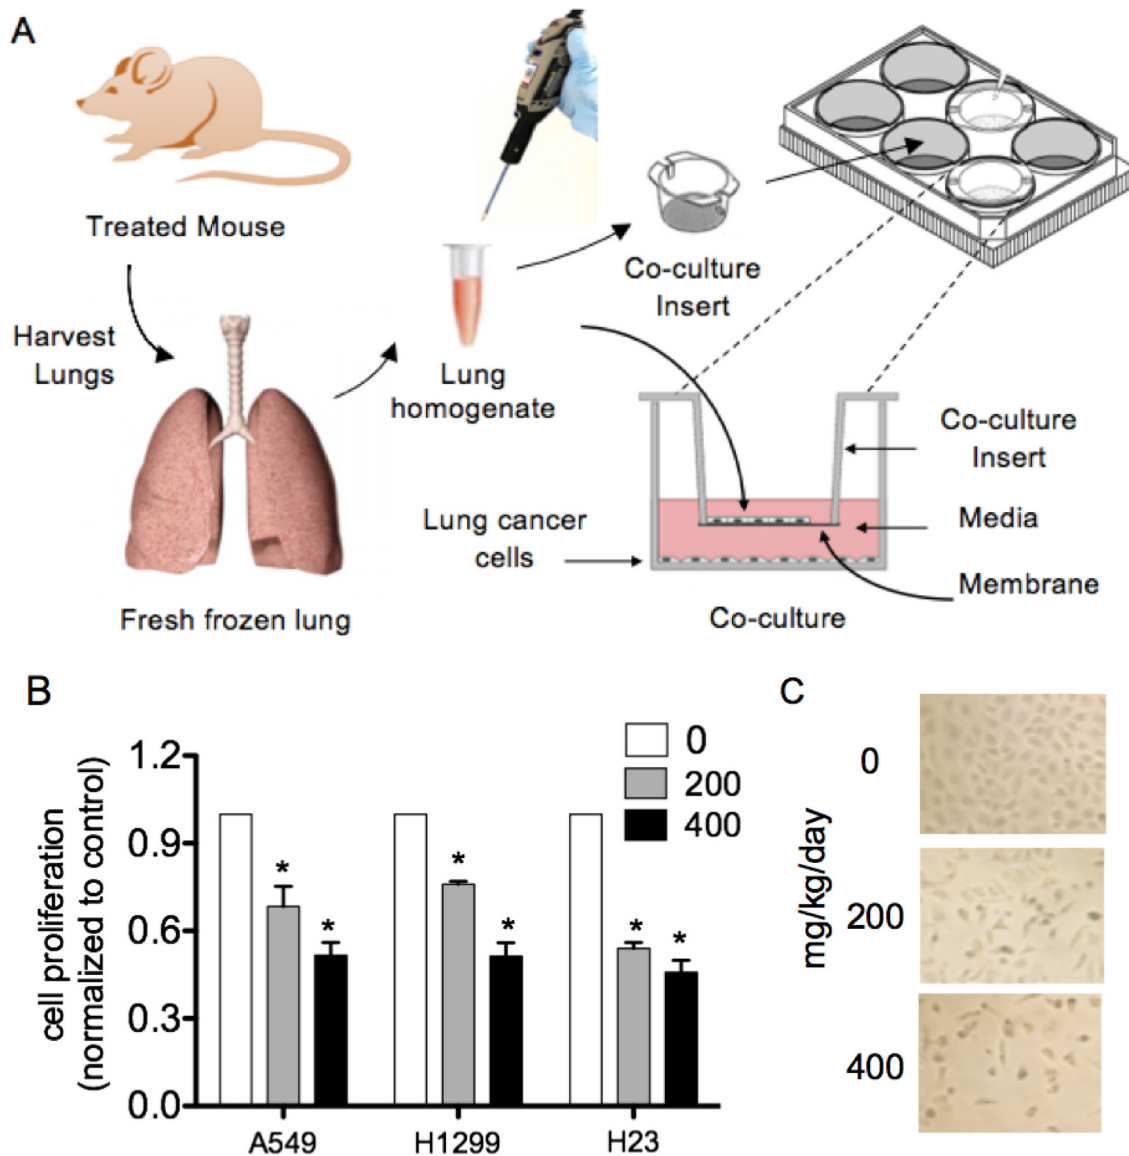

**Figure 7: Lung homogenates from LP treated nude mice significantly reduced lung cancer cell proliferation in comparison to water-treated mice.** Fresh, snap frozen whole lung homogenates from nude mice in our LP efficacy study were used. We placed 25  $\mu$ l of homogenate on 0.4  $\mu$ m pore size membrane culture insert for 12 well plates, then combined the inserts in 12 well culture plates with A549, H1299 or H23 cells grown overnight on the bottom wells (cells at exponential growth phase, approximately 60–70% confluence). The Co-cultures were then incubated overnight. (A) Co-culture schema. (B) Co-culture with lung homogenates from LP treated mice significantly and dose-dependently reduced lung neoplastic cell proliferations. (C) Representative photomicrographs of A549 cells co-cultured with lung homogenate. Columns, mean; bars, SD ( $n = 3$ ). \*,  $P < 0.05$ .

substantially lower (more than 1 order of magnitude) than the *in vitro* dose required to achieve IC<sub>50</sub> on tumor cell proliferation. Once again, our findings confirm the limitations of *in vitro* studies and the importance of *in vivo* PK studies in defining physiologic relevant dosing in reference to bioactivity and efficacy of an agent. Our modified PK study also demonstrated that chronic administration of LP did not induce its auto-metabolism, as the procyanidins and metabolites levels appear to be sustained and increase over time.

To further correlate the bioavailability of LP to bioactivity at our target organ of interest, and to demonstrate that oral administration of LP can reach and exert antineoplastic effects in the lungs, we developed a co-culture system using fresh frozen lung homogenate obtained from control and LP-treated mice. As anticipated, lung homogenate from mice gavaged with water did not have any effect on lung cancer cell proliferation, whereas homogenates from LP-treated mice significantly and dose-dependently reduced cell proliferation in all lung cancer cell lines tested. This novel co-culture system is easy to set up; it not only allows rapid assessment of bioavailability/bioactivity of LP in the lungs, but also presents a roadmap for future applications in preclinical drug development studies for other organ systems beyond the lungs, as similar co-culture approach can easily be adapted to assess bioactivity of treatment in other organs of interests.

Lung cancer is the leading cause of cancer death in the world. Despite advancements in anti-cancer treatment, including targeted molecular therapy, the 5-year survival for both NSCLC and SCLC remains dismal [27–32]. The lack of effective therapy provides the impetus to search for alternative, safe and efficacious antineoplastic agents against lung cancer, to impede the driving force of cancerization, and prevent lung cancer development in at-risk individuals. In this study, we demonstrate novel GSE mediated anti-neoplastic mechanisms involving modulation of oncomir miR-106b, its molecular target p21, and correlated these findings to the *in vivo* efficacy of LP, against lung cancer. Modulations of these signaling pathways may be useful as SEBM and predictor of response in future clinical trials. We also report the systemic bioavailability of oral LP, and bioactivity at the target organ using a novel lung homogenate co-culture system. In view of the complexity and heterogeneity of lung tumor biology in humans and the safety profile of the natural agent, it is conceivable that GSE may be used in combination with chemotherapy and/or radiation, or as adjuvant or neoadjuvant treatments to enhance overall efficacy of antineoplastic regimen against lung cancer. Our findings provide important rationales to further investigate the potential of GSE against both NSCLC and SCLC.

## MATERIALS AND METHODS

### Cell culture

As models to evaluate the anti-neoplastic effect of GSE against lung cancer, the human NSCLC lines, A549 (Adenocarcinoma), H520 (squamous cell carcinoma), H1299 (Metastatic NSCLC), DMS114 (small cell lung cancer), H23 (adenocarcinoma) (ATCC; Manassas, VA, USA), and normal human bronchial epithelial cells (NHBE) (Lonza Inc. Allendale, NJ, USA) were studied *in vitro*. Experiments involving all commercial cell lines were initiated within 6 months of purchase. Cell lines were not further authenticated. ATCC uses Short Tandem Repeat profiling for cell line authentication. Cells were maintained as monolayers in an atmosphere of 5% CO<sub>2</sub> in air at 37° C in 25-cm<sup>2</sup> tissue culture flasks containing 5.0 ml of RPMI-1640 medium supplemented with 10% FBS, 100 units/ml of penicillin, 0.1 mg/ml of streptomycin, and 2 mM of glutamine (JRH Biosciences; Lenexa, KS, USA) for A549; and RPMI-1640 medium with 2 mM L-glutamine adjusted to contain 1.5 g/L sodium bicarbonate, 4.5 g/L glucose, 10 mM HEPES, and 1.0 mM sodium pyruvate, 90%; fetal bovine serum, 10% for H1299 and H520 cells. Aliquots of 0.1 × 10<sup>6</sup> A549 or H520 cells were incubated at 37° C for 2 h. Varying doses of GSE (0, 18, 30, 36, 45, and 60 µg/ml) were added and the cells were incubated at 37° C for 18–44 h. The dose range of GSE was chosen based on considerations from prior published studies [6–8]. Primary normal human bronchial epithelial (NHBE) cells was used as control. NHBE cells were maintained according to the manufacturer's instructions. Aliquots of 0.5 × 10<sup>6</sup> of NHBE were plated in wells and incubated at 37° C for 18–44 h. For MTT assays, cells were plated at concentration of 6–8 × 10<sup>3</sup> cells/well in 96 well plates, conditioned and cultured for 18–44 h.

All conditioned culture supernatants and total RNA were harvested with cell lysates stored at –80° C until analysis, when applicable. Samples of mRNA were collected using the miRNeasy Mini Kit (Qiagen Inc, Valencia, CA, USA), per the manufacturer's instructions.

### GSE preparations

Standardized GSE (90% procyanidins, which were members of the proanthocyanidins class of flavonoids), was purchased from Organic Herb Inc., China. Stock solutions of GSE were made by dissolving the extract with deionized water. Aliquots of the stock were stored at –80° C and used only once for each set of experiments. For oral gavage, suspensions of varying doses of LP (Indena Inc., Milan, Italy), comprised of standardized oligomeric procyanidins complexed with soy phospholipid (1:2.6 w/w), were freshly prepared daily in deionized water for each treatment group just prior to gavage.



## Animals and tumor xenograft assay

Female athymic nude mice (8–9 weeks old) were xenografted, and treated with LP as previously described [8]. Briefly, exponentially growing A549 cells were mixed at a 1:1 ratio with Matrigel (Trevigen Inc. Gaithersburg, MD, USA), and a 100  $\mu$ L suspension containing  $1.2 \times 10^6$  cells was injected subcutaneously in the right flank of each mouse. Mice were randomly divided into 4 treatment groups ( $n = 9$  per group), and gavaged every morning with varying doses of LP (0, 200, 300 and 400 mg/kg). Clinical scoring including body wt, signs of illness or suffering were assessed daily and tumor growth was regularly monitored. Tumor size was determined using the ellipsoid volume formula ( $\pi/6 \times L \times W \times H$ ) [33]. The experiment was terminated at 56 days after tumor cell inoculation following the guidelines of Institutional Animal Care and Use Committee at the New Mexico VA Health Care System. Plasma, lungs and tumors (1/2 fresh frozen, 1/2 formalin fixed and paraffin embedded FFPE) were harvested at various time points for biomarker determination.

## Quantification of cell proliferation: MTT assay

To quantify cellular proliferation in conditioned cells, The MTT Cell Proliferation Assay (ATCC; Manassas, VA, USA) was used according to the manufacturer's instructions.

## Cell invasion assay

Conditioned cells were plated in serum free medium ( $1.5 \times 10^5$  cells/ml), with 300  $\mu$ l plated per 8.0  $\mu$ M pore size co-culture inserts for 24 well plate (Corning biocoat, Fisher Scientific) that were precoated with matrigel, then combined with the 24 well culture plate containing medium with 10% FBS in the bottom wells. After 24–48 h incubation, cells remaining on the top layer of the culture insert were removed by cotton swabs, cells that have migrated/invaded through the matrigel were fixed and stained with toluidine blue and counted in at least 5 randomly selected, fields.

## Real time (q) PCR for quantification of miRNA and mRNA expression

The total RNA isolated using miRNeasy Mini kit was converted to first strand cDNA via universal tailing and reverse transcription. The cDNA template was mixed with qPCR Master Mix and aliquoted into each well of the 96-well plate containing an array of pre-dispensed miRNA-specific primer sets (MAH-100, SA Bioscience; Fredrick, MD, USA). QPCR was performed on the Bio-Rad MyiQ cyclor (Bio-Rad; Hercules, CA, USA). Following identification of miRNA of interest, further validation using qPCR with specific miR-106b primers

was performed, per manufacturer's instructions. The qPCR reactions for the *CDKN1A* gene and the *MIR106B* gene were performed using reagents, specific primers from SA Bioscience per the manufacturer's instructions. Any  $C_t$  greater than 35 was considered a negative call. The values were first normalized to beta-actin, then to control, using  $\Delta\Delta C_t$  based fold-change calculations from raw threshold cycle ( $C_t$ ) data. Data are depicted in fold changes normalized to control. Negative fold change represents down-regulation; a reduction of 50% or 75% from control (untreated cells) is equivalent to -2 or -3 fold changes, respectively.

## MiRNA *in situ* hybridization assay

*In situ* hybridization (ISH) of miR-106b was performed using the QuantiGene® ViewRNA miRNA ISH cell assay kit (Affymetrix Panomics, Santa Clara, CA, USA). Briefly,  $8 \times 10^3$  cells/well were plated in a 96 well plate precoated with Poly-L-Lysine. After 2 h adherence, cells were conditioned with varying doses of GSE overnight, then fixed in 4% formaldehyde, cross linked with EDC, permeablized with detergent and digested with protease and then hybridized to target probes, followed by amplification and detection steps as per manufacturer's instruction.

## MiRNA mimic transfection

Transfections of miR-106b mimic into lung neoplastic cells were achieved using miRNA specific mimic, and transfecting reagents according to the manufacturer's instructions (Qiagen Inc. Valencia, CA, USA). Briefly,  $6-8 \times 10^3$  of cells in 150  $\mu$ l of cells were aliquoted into 96-well plates. After 1 h of adherence, 50  $\mu$ l of specific miRNA transfection complexes were gently added to the cells with gentle swirling. The cells were incubated for 4 h, then conditioned overnight with GSE, followed by the MTT assay. Cell conditions were scaled up 10 fold in 12 well plates for total RNA harvest.

## P21 ELISA

Human Total p21 ELISA kit was used to quantify p21 protein in conditioned cell lysates per the manufacturer's instructions (R & D Systems, Minneapolis, MN, USA). P21 levels from each sample were referenced to the concentrations of total protein. Total protein levels were determined using the Pierce BCA Protein Assay kit per the manufacturer's instruction (ThermoScientific, Rockford, IL, USA).

## Lung homogenate co-culture

Snap fresh frozen whole lungs harvested from nude mice treated with water and LP (200 or 400 mg/kg/day) in our maximum tolerated dose (MTD) study were homogenized in RPMI medium (40 mg/ $\mu$ l), using a handheld Homogenizer (TissueRuptor, Qiagen, Valencia,

CA, USA). Twenty-five  $\mu\text{l}$  of lung homogenate per condition was added onto a 0.4  $\mu\text{m}$  co-culture insert, then the inserts were combined in a 12-well culture plate pre-plated with  $0.6 \times 10^5$  cells/ml, 1 ml/well of A549 or H23 cells, or  $0.4 \times 10^5$  cells/ml, 1 ml/well of H1299 cells grown overnight on the bottom wells. The co-cultures were then incubated overnight. The effects of GSE-treated lung homogenate on lung cancer cell proliferation were determined.

### Measurement of plasma procyanidins and metabolites

Procyanidins were extracted from mouse plasma (0.2 mL) by incubating samples with 0.3 mL of enzyme solution (1000 U  $\beta$ -glucuronidase with 40 U sulfatase activity in 0.5 M  $\text{NaH}_2\text{PO}_4$  pH 5.0 containing 2% ascorbic acid) for 45 minutes at 37° C. Following incubation, samples were extracted three times with ethyl acetate/2% ascorbic acid. Combined ethyl acetate extracts were dried, and residue was resolubilized in 100  $\mu\text{L}$  50% aqueous methanol prior to analysis using LC/MS. Briefly, separation was performed on a Surveyor HPLC system equipped with a diode array detector (Thermo Finnigan, San Jose, CA, USA) using a Zorbax SB-C18 column (4.6  $\times$  150 mm, 3.5  $\mu\text{m}$ ; Agilent, Santa Clara, CA, USA). A binary mobile phase consisting of solvent systems A and B was used in gradient elution where A was 1% acetic acid (v/v) in ddH<sub>2</sub>O and B was acetonitrile. Mobile phase flow rate was 0.75 mL/min with a T splitter to make 0.25 mL/min flow to MS. Initial conditions was set at 98:2 A:B with a linear gradient to 75:25 from 0 to 25 min, and to 60:40 from 25 to 32 min. Following separation, the column effluent was introduced by negative mode electrospray ionization (ESI) into an LCQ Advantage Ion Trap Mass Spectrometer. ESI capillary voltage was -4.0 kV, capillary temperature was 275° C, sheath gas flow was set at 40, and the normalized collision energy was set at 45%. Spectroscopic (UV at 280 nm) and MS/MS data (577/425) was collected and analyzed using Xcalibur software (Thermo Finnigan). Concentrations of plasma procyanidin B1 and B2 were determined by internal calibration and ethyl gallate was used as an internal standard.

### Statistical analysis

Data were expressed as the mean  $\pm$  SD in all circumstances where mean values are compared. Data were analyzed by paired Student's *t* test and/or ANOVA. Batch analyses were performed for each comparison group to eliminate interassay variability. Differences are considered significant when  $p < 0.05$ .

### Abbreviations

GSE: grape seed procyanidin extract; CDKN1A: cyclin-dependent kinase inhibitor 1A; LP: leucoselect phytosome; PK: pharmacokinetics; NSCLC: non-small cell lung cancer; SCLC: Small cell lung cancer; SEBM: surrogate endpoint biomarkers; ScRNA: scrambled oligonucleotides

### Author contributions

JTM conceived the project and designed most of the experiments. BX, JTM, QL, and LM performed experiments. JTM, BX, QL, CQ and LM worked on data analysis, interpretations, discussion, and manuscript preparations.

### ACKNOWLEDGMENTS

We wish to thank J. Smoake and K. Park, for their excellent technical assistance; S. Kye for some of the illustrations; S. Baca, A. Wagner and K. O'hair for animal care and training; Dr. M. Ferruzzi for helpful discussions on GSE and metabolites measurements. LP was generously provided by Indena.

### CONFLICTS OF INTEREST

The authors have no conflicts of interest to disclose.

### FUNDING

VA Merit Review (JTM, BX002258) and National Cancer Institute (JTM, R21CA173211).

### REFERENCES

1. Cavaliere C, Foglia P, Gubbiotti R, Sacchetti P, Samperi R, Laganà A. Rapid-resolution liquid chromatography/mass spectrometry for determination and quantitation of polyphenols in grape berries. *Rapid Commun Mass Spectrom*. 2008; 22:3089–99.
2. Shi J, Yu J, Pohorly JE, Kakuda Y. Polyphenolics in grape seeds-biochemistry and functionality. *J Med Food*. 2003; 6:291–9.
3. National Center for Complementary and Integrative Health. Grape seed extract, herb at a glance. Bethesda (MD): NIH; 2012.
4. Dinicola S, Cucina A, Pasqualato A, D'Anselmi F, Proietti S, Lisi E, Pasqua G, Antonacci D, Bizzarri M. Antiproliferative and apoptotic effects triggered by grape seed extract (GSE) versus epigallocatechin and procyanidins on colon cancer cell lines. *Int J Mol Sci*. 2012; 13:651–64.

5. Shrotriya S, Deep G, Gu M, Kaur M, Jain AK, Inturi S, Agarwal R, Agarwal C. Generation of reactive oxygen species by grape seed extract causes irreparable DNA damage leading to G2/M arrest and apoptosis selectively in head and neck squamous cell carcinoma cells. *Carcinogenesis*. 2012; 33:848–58.
6. Akhtar S, Meeran SM, Katiyar N, Katiyar SK. Grape seed proanthocyanidins inhibit the growth of human non-small cell lung cancer xenografts by targeting insulin-like growth factor binding protein-3, tumor cell proliferation, and angiogenic factors. *Clin Cancer Res*. 2009; 15:821–31.
7. Sharma SD, Meeran SM, Katiyar SK. Proanthocyanidins inhibit *in vitro* and *in vivo* growth of human non-small cell lung cancer cells by inhibiting the prostaglandin E(2) and prostaglandin E(2) receptors. *Mol Cancer Ther*. 2010; 9:569–80.
8. Mao JT, Xue B, Smoake J, Lu QY, Park H, Henning SM, Burns W, Bernabei A, Elashoff D, Serio KJ, Massie L. MicroRNA-19a/b mediates grape seed procyanidin extract-induced anti-neoplastic effects against lung cancer. *J Nutr Biochem*. 2016; 34:118–25.
9. Mao JT, Smoake J, Park H, Lu QY, Xue B. Grape seed procyanidin extract mediates antineoplastic effects against lung cancer via modulations of prostacyclin and 15-HETE eicosanoid pathways. *Cancer Prev Res (Phila)*. 2016; 9:925–32.
10. Filipowicz W, Bhattacharyya SN, Sonenberg N. Mechanisms of post-transcriptional regulation by microRNAs: are the answers in sight? *Nat Rev Genet*. 2008; 9:102–14.
11. Hammond SM. RNAi, microRNAs, and human disease. *Cancer Chemother Pharmacol*. 2006; 58:s63–8.
12. Mitchell PS, Parkin RK, Kroh EM, Fritz BR, Wyman SK, Pogosova-Agadjanyan EL, Peterson A, Noteboom J, O'Briant KC, Allen A, Lin DW, Urban N, Drescher CW, et al. Circulating microRNAs as stable blood-based markers for cancer detection. *Proc Natl Acad Sci USA*. 2008; 105:10513–8.
13. Boeri M, Verri C, Conte D, Roz L, Modena P, Facchinetti F, Calabrò E, Croce CM, Pastorino U, Sozzi G. MicroRNA signatures in tissues and plasma predict development and prognosis of computed tomography detected lung cancer. *Proc Natl Acad Sci USA*. 2011; 108:3713–8.
14. Cai K, Wang Y, Bao X. MiR-106b promotes cell proliferation via targeting RB in laryngeal carcinoma. *J Exp Clin Cancer Res*. 2011; 30:73.
15. Li B, Shi XB, Nori D, Chao CK, Chen AM, Valicenti R, White RV. Down-regulation of microRNA 106b is involved in p21-mediated cell cycle arrest in response to radiation in prostate cancer cells. *Prostate*. 2011; 71:567–574.
16. Li Y, Tan W, Neo TW, Aung MO, Wasser S, Lim SG, Tan TM. Role of the miR-106b-25 microRNA cluster in hepatocellular carcinoma. *Cancer Sci*. 2009; 100:1234–1242.
17. Petrocca F, Visone R, Onelli MR, Shah MH, Nicoloso MS, de Martino I, Iliopoulos D, Pillozzi E, Liu GG, Negrini M, Cavazzini L, Volinia S, Alder H, et al. E2F1-regulated microRNAs impair TGFbeta-dependent cell-cycle arrest and apoptosis in gastric cancer. *Cancer Cell*. 2008; 13:272–286.
18. Smith AL, Iwanaga R, Drasin DJ, Micalizzi DS, Vartuli RL, Tan AC, Ford HL. The miR-106b-25 cluster targets Smad7, activates TGF-beta signaling, and induces EMT and tumor initiating cell characteristics downstream of Six1 in human breast cancer. *Oncogene*. 2012; 31:5162–5171.
19. Zhao ZN, Bai JX, Zhou Q, Yan B, Qin WW, Jia LT, Meng YL, Jin BQ, Yao LB, Wang T, Yang AG. TSA suppresses miR-106b-93-25 cluster expression through down regulation of MYC and inhibits proliferation and induces apoptosis in human EMC. *PLoS One*. 2012; 7:e45133.
20. Molina-Pinelo S, Pastor MD, Suarez R, Romero-Romero B, González De la Peña M, Salinas A, García-Carbonero R, De Miguel MJ, Rodríguez-Panadero F, Carnero A, Paz-Ares L. MicroRNA clusters: dysregulation in lung adenocarcinoma and COPD. *Eur Respir J*. 2014; 43:1740–9.
21. Prasad R, Katiyar SK. Down-regulation of miRNA-106b inhibits growth of melanoma cells by promoting G1-phase cell cycle arrest and reactivation of p21/WAF1/Cip1 protein. *Oncotarget*. 2014; 5:10636–49. <https://doi.org/10.18632/oncotarget.2527>.
22. Abbas T, Dutta A. p21 in cancer: intricate networks and multiple activities. *Nat Rev Cancer*. 2009; 9:400–414.
23. Xiong Y, Hannon GJ, Zhang H, Casso D, Kobayashi R, Beach D. p21 is a universal inhibitor of cyclin kinases. *Nature*. 1993; 366:701–4.
24. Kim EM, Jung CH, Kim J, Hwang SG, Park JK, Um HD. The p53/p21 Complex Regulates Cancer Cell Invasion and Apoptosis by Targeting Bcl-2 Family Proteins. *Cancer Res*. 2017; 77:3092–3100.
25. Deprez S, Mila I, Huneau JF, Tome D, Scalbert A. Transport of proanthocyanidin dimer, trimer, and polymer across monolayers of human intestinal epithelial Caco-2 cells. *Antioxid Redox Signal*. 2001; 3:957–67.
26. Scalbert A, Williamson G. Dietary intake and bioavailability of polyphenols. *J Nutr*. 2000; 130:2073S–2085S.
27. Burns DM. Tobacco smoking. In: Samet J, editor. *In Epidemiology of Lung Cancer*. New York: Marcel Dekker, Inc.; 1994. pp. 15–9.
28. Fry WA, Menck HR, Winchester DP. The National Cancer Data Base report on lung cancer. *Cancer*. 1996; 77:1947–55. [https://doi.org/10.1002/\(SICI\)1097-0142\(19960501\)77:9%3C1947::AID-CNCR27%3E3.0.CO;2-Z](https://doi.org/10.1002/(SICI)1097-0142(19960501)77:9%3C1947::AID-CNCR27%3E3.0.CO;2-Z).
29. American Cancer Society. *Cancer Facts and Figures 2016*. Atlanta: American Cancer Society. 2016.
30. Pignon JP, Arriagada R, Ihde DC, Johnson DH, Perry MC, Souhami RL, Brodin O, Joss RA, Kies MS, Lebeau B, Onoshi T, Østerlind K, Tattersall MH, Wagner H. A

- meta-analysis of thoracic radiotherapy for small-cell lung cancer. *N Engl J Med.* 1992; 327:1618–24.
31. Stahel RA, Ginsberg R, Havemann K, Hirsch FR, Ihde DC, Jassem J, Karrer K, Maureti LH, Osterlind K, Van Houtte P. Staging and prognostic factors in small cell lung cancer: A consensus report. *Lung Cancer.* 1989; 5:119–26.
  32. Pietanza MC, Byers LA, Minna JD, Rudin CM. Small cell lung cancer: Will recent progress lead to improved outcomes? *Clin Cancer Res.* 2015; 21:2244–55.
  33. Tomayko MM, Reynolds CP. Determination of subcutaneous tumor size in athymic (nude) mice. *Cancer Cancer Chemother Pharmacol.* 1989; 24:148–54.
